# Supplementary material for: Structure-directing role of CH⋯X (X = C, N, S, Cl) interactions in three ionic cobalt complexes: X-ray investigation and DFT study using QTAIM Vr predictor to eliminate the effect of pure Coulombic forces
Source: Royal Society of Chemistry journal article supplement (doi:10.1039/d3ra03828a), 2023-01-01
Supplement: d3ra03828a1.pdf [file d3ra03828a1.pdf]

**Structure directing role of CH $\cdots$ X (X = C, N, S, Cl) interactions in three ionic cobalt(III) complexes: X-ray investigation and DFT study using QTAIM Vr predictor to eliminate the effect of pure coulombic forces**

Susovan Bera,<sup>a</sup> Sudip Bhunia,<sup>a</sup> Rosa M. Gomila,<sup>b</sup> Michael G. B. Drew,<sup>c</sup> Antonio Frontera,<sup>b,\*</sup> and Shouvik Chattopadhyay<sup>a,\*</sup>

<sup>a</sup>*Department of Chemistry, Inorganic Section, Jadavpur University, Kolkata - 700032, India. Tel: +91-33-24572941, E-mail: [shouvik.chem@gmail.com](mailto:shouvik.chem@gmail.com)*

<sup>b</sup>*Department of Chemistry, Universitat de les Illes Balears, Crta de Valldemossa km 7.5, 07122 Palma de Mallorca (Balears), SPAIN. E-mail: [toni.frontera@uib.es](mailto:toni.frontera@uib.es)*

<sup>c</sup>*School of Chemistry, The University of Reading, P.O. Box 224, Whiteknights, Reading RG6 6AD, United Kingdom*

---

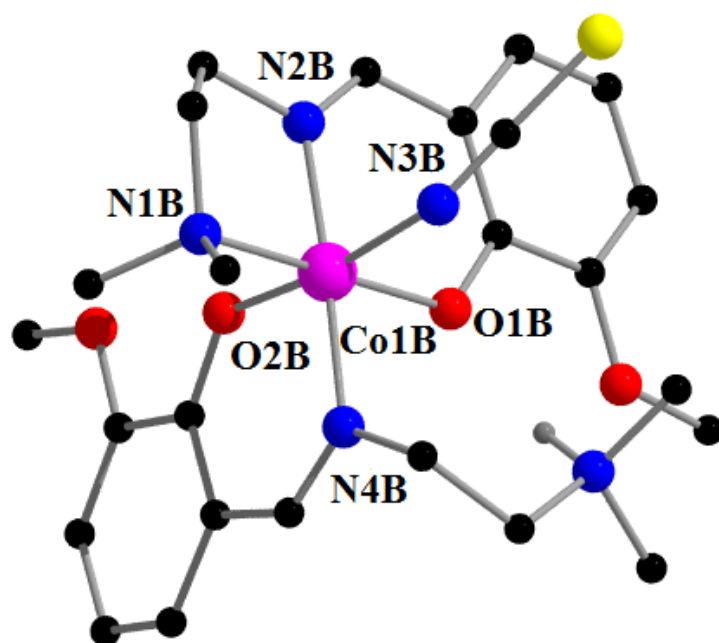

**Fig. S1:** Perspective view of the cationic part (Unit B) of complex **3** with selective atom numbering scheme. Only one hydrogen atom (attached with the amine nitrogen atom) is shown.

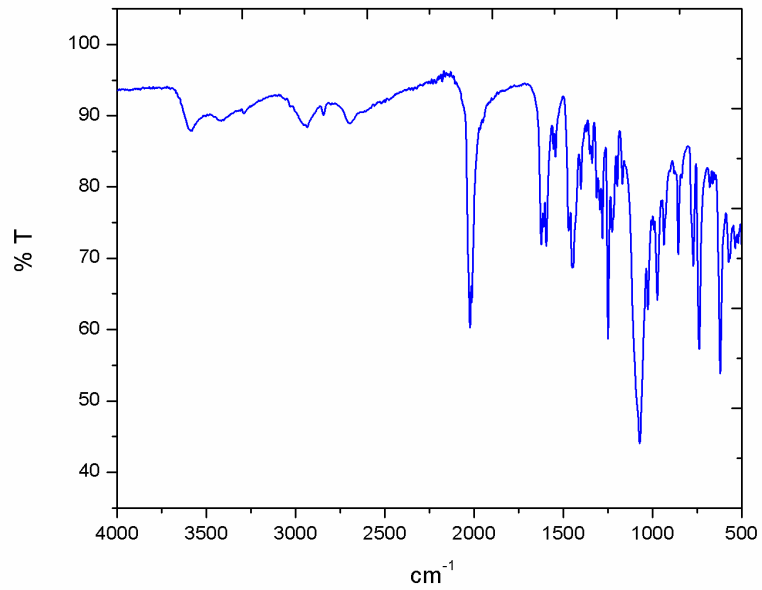

**Fig. S2:**IR spectrum of complex 1.

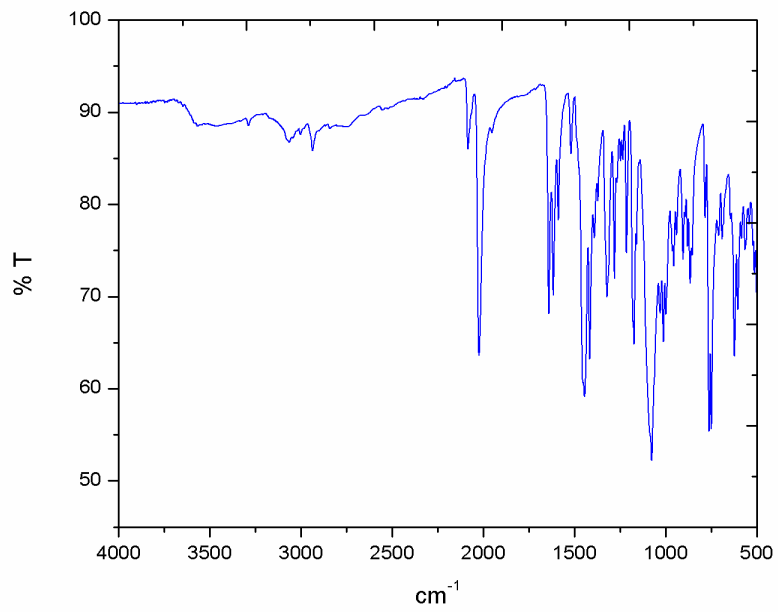

**Fig. S3:**IR spectrum of complex 2.

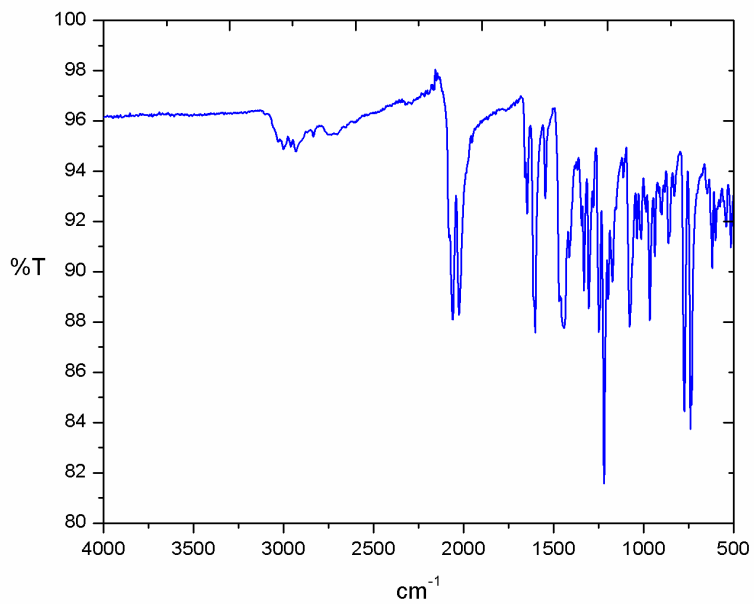

**Fig. S4:** IR spectrum of complex 3.

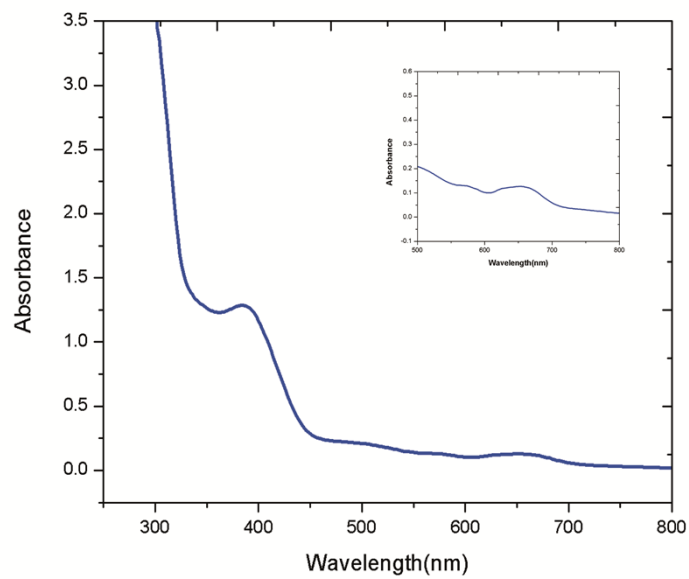

**Fig. S5:** UV-Vis spectrum of complex 3.

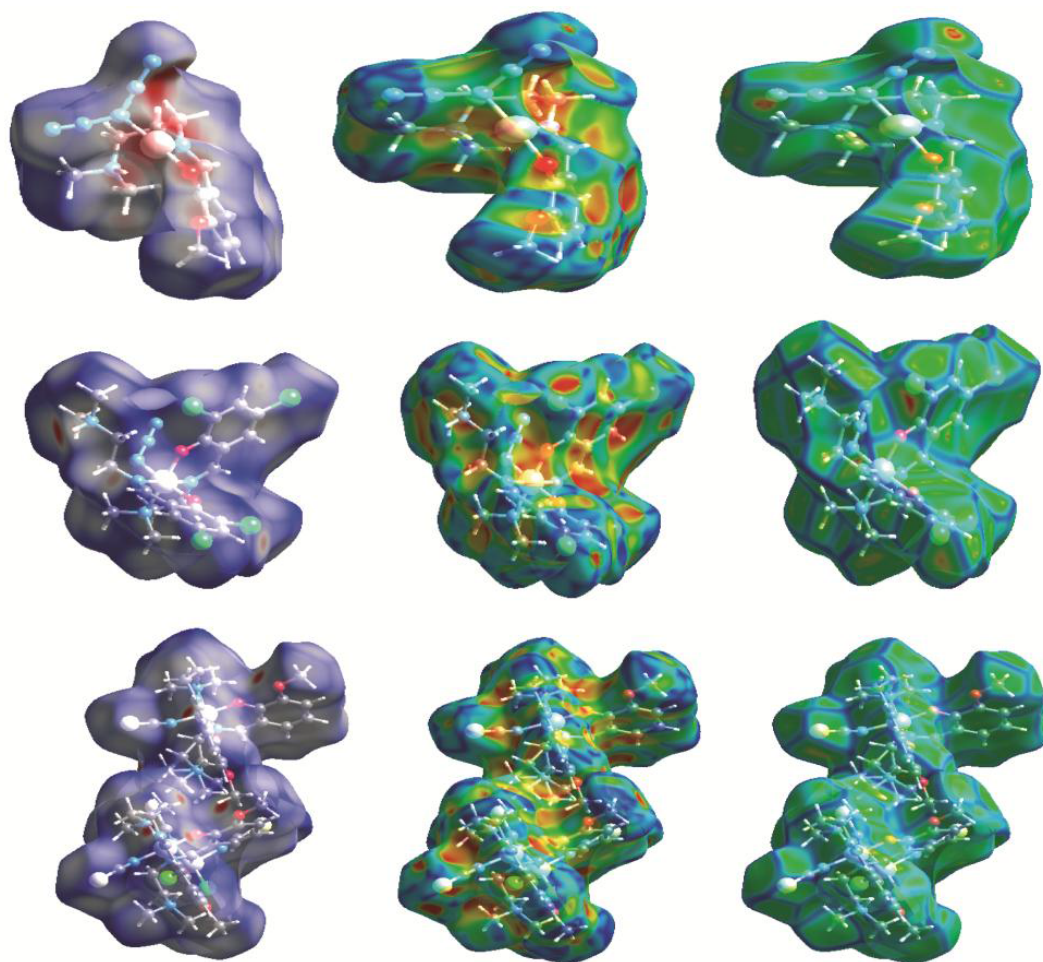

**Fig. S6:** Hirshfeld surfaces of complexes **1**, **2** and **3** mapped over  $d_{\text{norm}}$  (left), shape index (middle) and curvedness (right).

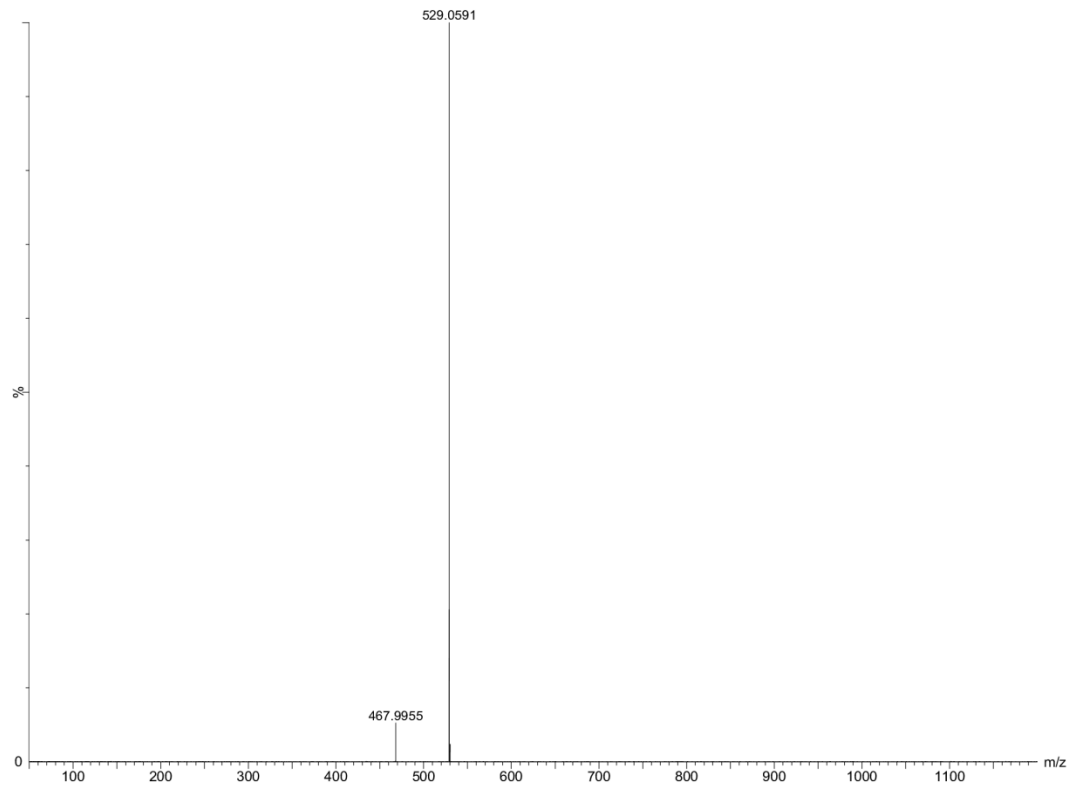

**Fig. S7:** ESI-MS spectrum of complex **1** in acetonitrile medium.

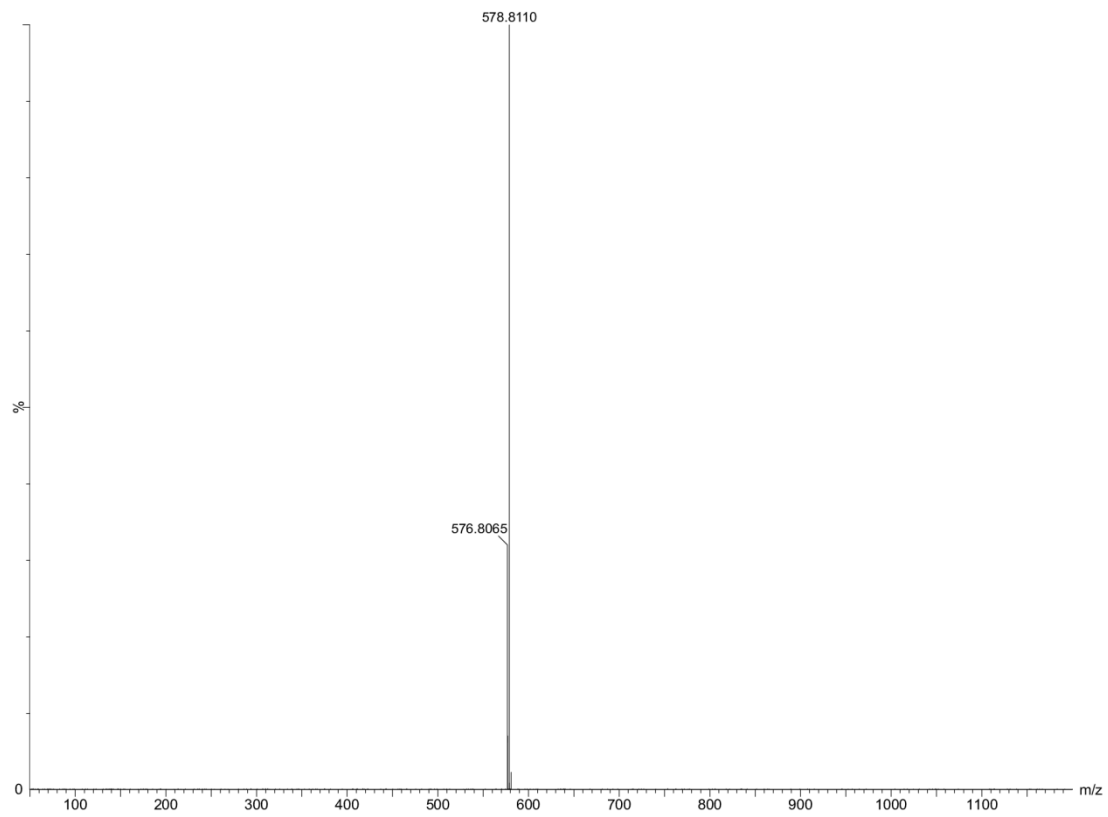

**Fig. S8:** ESI-MS spectrum of complex **2** in acetonitrile medium.

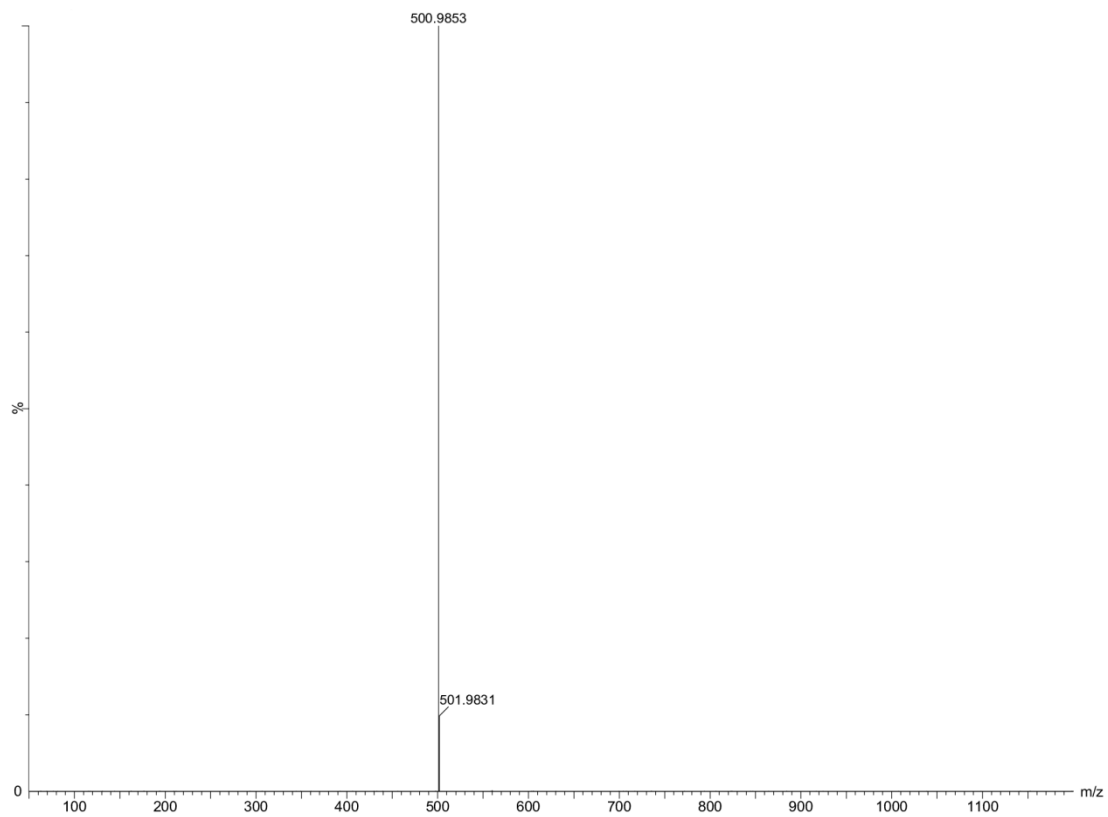

**Fig. S9:** ESI-MS spectrum of complex **3** in acetonitrile medium.



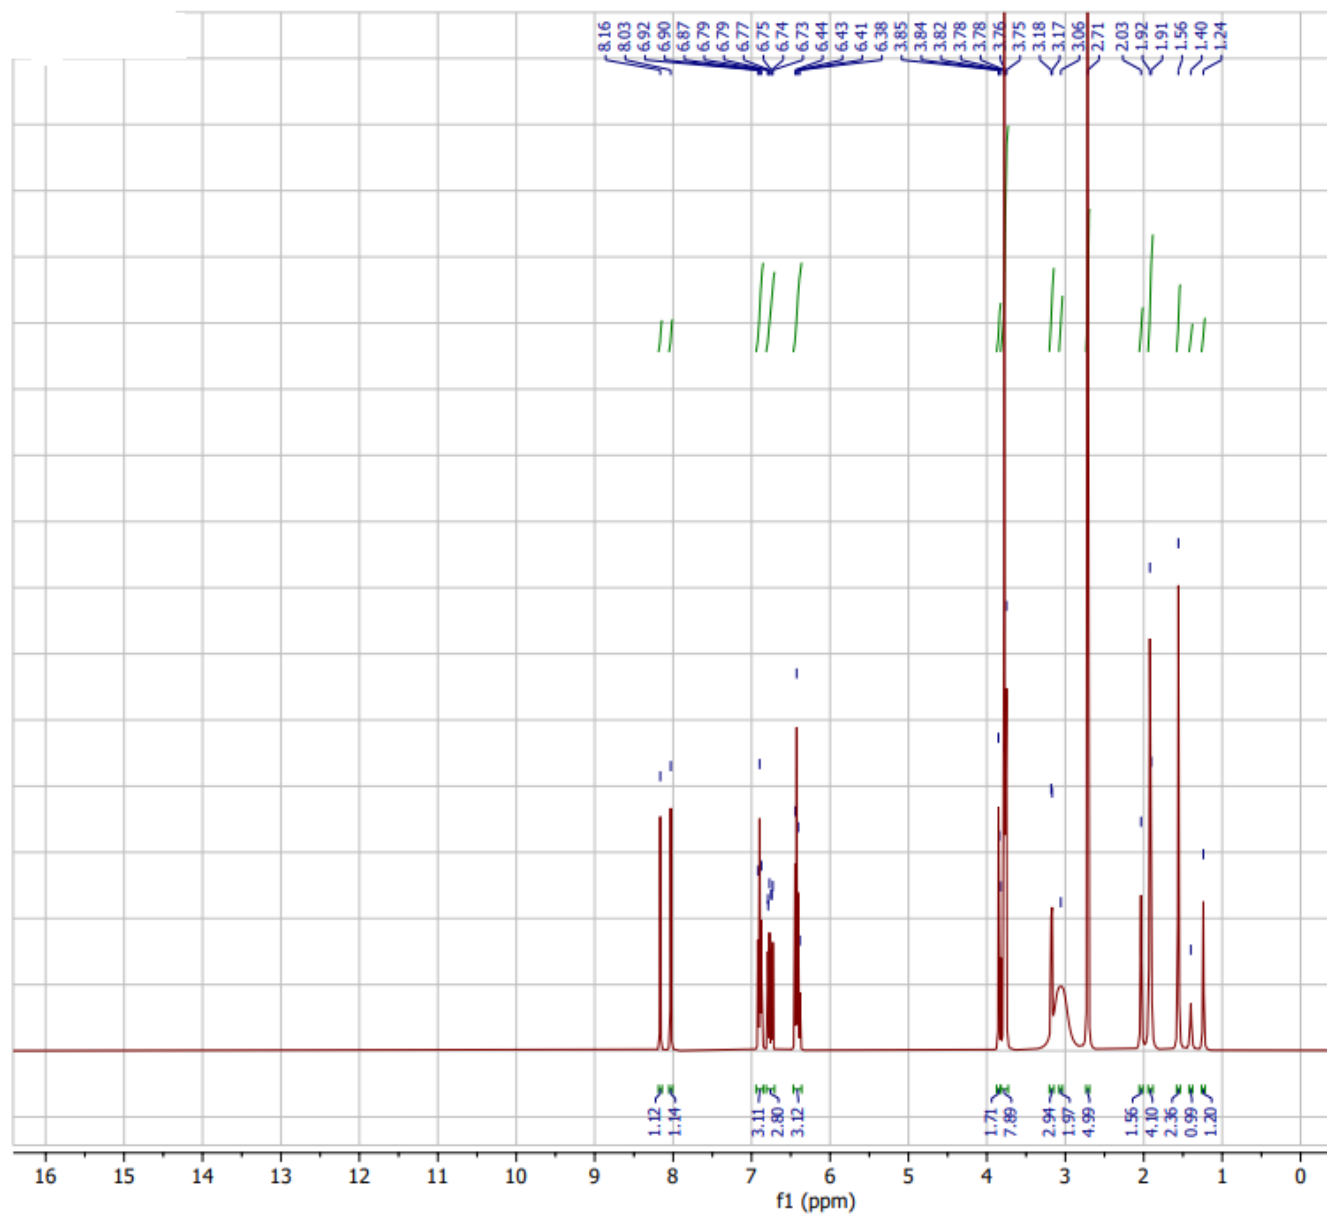

**Fig. S10:**  $^1\text{H}$  NMR spectrum of complex 1.

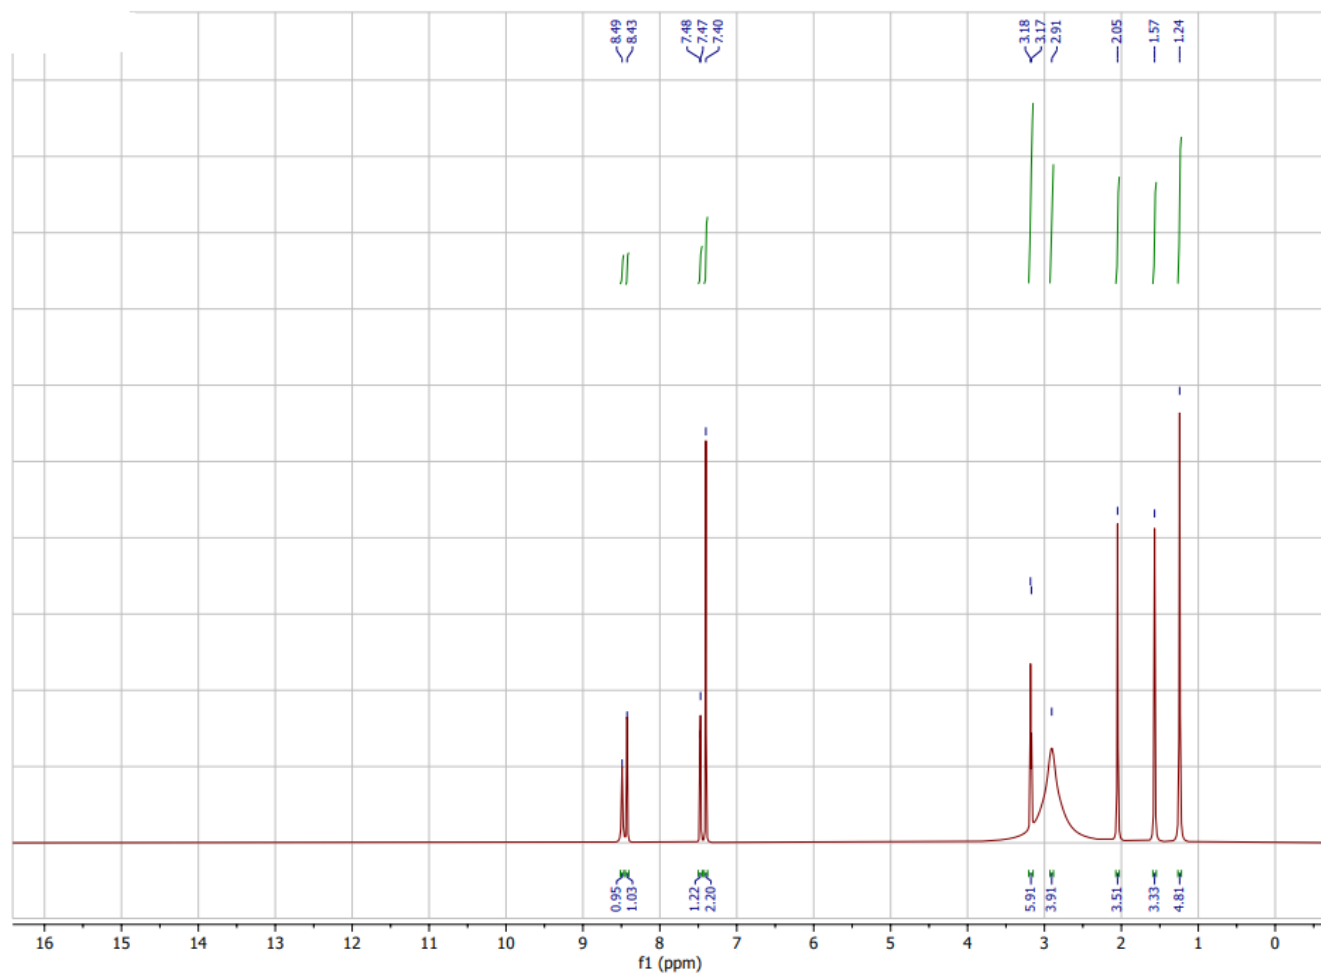

**Fig. S11:** <sup>1</sup>H NMR spectrum of complex 2.
